# Supplementary material
Source: HighWire-hosted journal article supplement (http://www.annfammed.org/highwire/filestream/701/field_highwire_adjunct_files/0/Grant_Supp_Figure.pdf)
Supplement: Grant_Supp_Figure.pdf [file Grant_Supp_Figure.pdf]

**Supplemental materials for:**

Grant RW, Lyles C, Uratsu CS, Vo MT, Bayliss EA, Heisler M. Visit Planning using a waiting room health IT tool: the aligning patients and providers randomized controlled trial. *Ann Fam Med*. 2019;17(2):141-149.

## Supplemental Figure 1: Screen Shot of Visit Planner

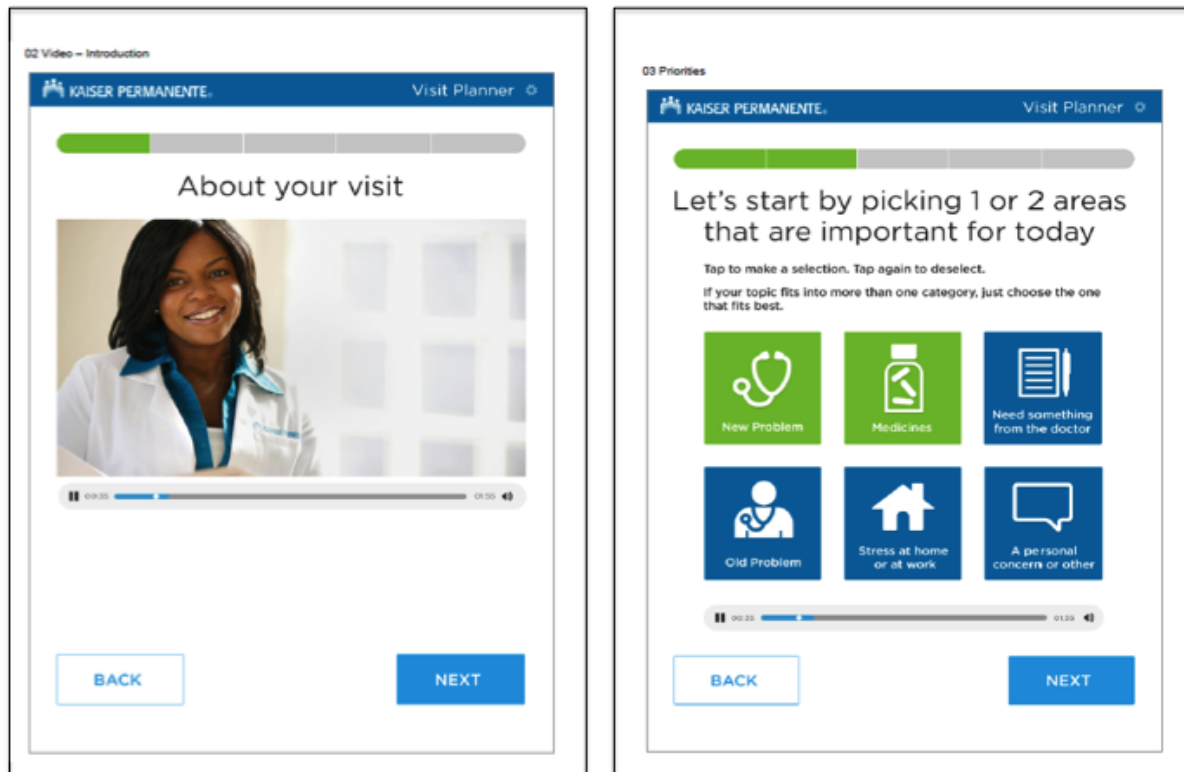

### Figure Legend

The left panel shows the initial 30-second video explaining the importance of identifying and communicating the patient's top visit priorities. Text displays during the video emphasize key points. The right panel shows how patients were guided to choose 1 or 2 top priorities from a group of 6 options. On the next screen, patients had the opportunity to provide further specific detail for each of their selected priorities. All patient-entered data were summarized and printed out as a single sheet for the patients to bring in to the visit.
